# Supplementary material
Source: HighWire-hosted journal article supplement (https://erj.ersjournals.com/content/58/5/2101569)
Supplement: inline-supplementary-material-1 [file inline-supplementary-material-1.pdf]

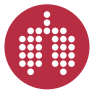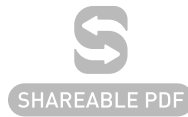

# SPLUNC1 comes of age? Predicting acute exacerbations in cystic fibrosis

Colin D. Bingle<sup>1</sup> and Lynne Bingle<sup>2</sup>

<sup>1</sup>Dept of Infection, Immunity and Cardiovascular Disease, University of Sheffield, Sheffield, UK. <sup>2</sup>Academic Unit of Oral and Maxillofacial Pathology, School of Clinical Dentistry, University of Sheffield, Sheffield, UK.

Corresponding author: Colin Bingle ([c.d.bingle@sheffield.ac.uk](mailto:c.d.bingle@sheffield.ac.uk))

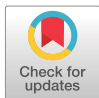

Shareable abstract (@ERSpublications)

**Measurement of the levels of SPLUNC1 in sputum may be a useful biomarker of cystic fibrosis exacerbations** <https://bit.ly/2TBfaB9>

**Cite this article as:** Bingle CD, Bingle L. SPLUNC1 comes of age? Predicting acute exacerbations in cystic fibrosis. *Eur Respir J* 2021; 58: 2101569 [DOI: 10.1183/13993003.01569-2021].

This single-page version can be shared freely online.

Copyright ©The authors 2021. For reproduction rights and permissions contact [permissions@ersnet.org](mailto:permissions@ersnet.org)

Received: 03 June 2021  
Accepted: 08 June 2021

Cystic fibrosis (CF) was first recognised as a specific disease in 1938 in an autopsy study of malnourished infants who displayed mucus plugging of glandular ducts [1]. The disease was characterised by malabsorption of fat and protein, steatorrhea, growth failure and pulmonary infection, which was ultimately fatal [1, 2]. Since that time, life expectancy for patients with CF has steadily improved from around 6 months to more than 40 years [3]. In many countries, the number of adults with CF now exceeds the number of children [3, 4]. Initially, improvement in survival occurred without any knowledge of the basic disease defect, using treatments directed at nutritional repletion, relief of airway obstruction, and antibiotic therapy of lung infection [2, 3]. The discovery of the CFTR gene in 1989 marked an important milestone in the history of CF [5] and led directly to the development of an array of targeted therapeutics that have shown great efficacy in modifying the disease [6, 7]. Although therapies have changed, aggressive treatment remains the foundation of clinical care.
